# Supplementary material for: Antimicrobial Resistance and Virulence Factors of Proteus mirabilis Isolated from Dog with Chronic Otitis Externa
Source: MDPI journal article supplement (doi:10.3390/pathogens11101215), 2022-10-21
Supplement: s1 [file s1]

**Supplementary Table S1.** Multiple antibiotic resistance (MAR) index of *Proteus mirabilis* strains isolated from chronic otitis externa in dogs. The isolates were listed in order of phylogenetic tree in Figure 2.

| <i>Proteus</i> isolates | MAR index |
|-------------------------|-----------|
| Pm_SNUABM_05            | 0.636     |
| Pm_SNUABM_03            | 0.818     |
| Pm_SNUABM_15            | 0.909     |
| Pm_SNUABM_07            | 0.727     |
| Pm_SNUABM_28            | 0         |
| Pm_SNUABM_09            | 0.818     |
| Pm_SNUABM_08            | 0.818     |
| Pm_SNUABM_30            | 0.272     |
| Pm_SNUABM_23            | 0.818     |
| Pm_SNUABM_12            | 0.090     |
| Pm_SNUABM_02            | 0.818     |
| Pm_SNUABM_06            | 0.090     |
| Pm_SNUABM_21            | 0         |
| Pm_SNUABM_27            | 0.363     |
| Pm_SNUABM_22            | 0         |
| Pm_SNUABM_25            | 0         |
| Pm_SNUABM_32            | 1         |
| Pm_SNUABM_16            | 0.818     |
| Pm_SNUABM_14            | 0.272     |
| Pm_SNUABM_20            | 0         |
| Pm_SNUABM_29            | 0.727     |
| Pm_SNUABM_01            | 0.727     |
| Pm_SNUABM_17            | 0.909     |
| Pm_SNUABM_11            | 1         |
| Pm_SNUABM_10            | 0.636     |
| Pm_SNUABM_18            | 0.818     |
| Pm_SNUABM_19            | 0.818     |
| Pm_SNUABM_26            | 0.545     |
| Pm_SNUABM_24            | 0.909     |
| Pm_SNUABM_31            | 0         |
| Pm_SNUABM_13            | 0.454     |
| Pm_SNUABM_04            | 0.272     |
| Mean value              | 0.534     |
